# Supplementary material for: Barriers and facilitators when seeking healthcare for septic children in Ghana: a single-centre qualitative study of patient caregivers and emergency department clinicians
Source: PubMed Central journal article supplement — BMJ Paediatr Open. 2024 Aug 21;8(1):e002814. doi: 10.1136/bmjpo-2024-002814 (PMC11340702; doi:10.1136/bmjpo-2024-002814), 2024-08-21
Supplement: bmjpo-8-1-s001.pdf [file bmjpo-8-1-s001.pdf]

## **INTERVIEW GUIDE FOR CAREGIVERS**

**Code: IDI/REACH/CG.....**

Date: ...../...../.....

Length of the interview:

Place of the interview:

Interviewer:

Note taker:

### **Introduction**

Good morning! My name is ....., I am here to have a little discussion with you about your child who has been admitted here (KATH). This conversation is very confidential and will not be linked to you in any way as I will not ask for your names but use a code to identify you. I would like to record the discussion using a tape recorder so that I do not miss out on any important information. This recorded information is for research purposes only and will not be given out to anyone who is not a member of the research team. After we have written out the conversation, it will be erased completely from the memory of the tape recorder. This discussion will last for about 20 minutes. The information gathered will help to reduce child morbidity and mortality in Ghana and Africa.

If you agree, I would put on the tape recorder and then you say I agree so that we start.

|                                                                                  |                                                                                                                                                                                                                                                                                                                                                                                                                                                                            |
|----------------------------------------------------------------------------------|----------------------------------------------------------------------------------------------------------------------------------------------------------------------------------------------------------------------------------------------------------------------------------------------------------------------------------------------------------------------------------------------------------------------------------------------------------------------------|
| <p><b>Background Characteristics</b></p>                                         | <p><b>(For each respondent ask the following)</b></p> <ul style="list-style-type: none"> <li>i. Age of caregiver:</li> <li>ii. Gender:</li> <li>iii. Age of child:</li> <li>iv. Gender</li> <li>v. Community coming from:</li> <li>vi. Referred/ Not Referred:</li> <li>vii. Parity:</li> <li>viii. Marital status:</li> <li>ix. Educational level:</li> <li>x. Occupation:</li> <li>xi. Other caregivers:</li> <li>xii. Religion:</li> <li>xiii. Ethnic group:</li> </ul> |
| <p><b>Environmental Characteristics</b></p>                                      | <ul style="list-style-type: none"> <li>xiv. How many are you in your household?</li> <li>xv. What is your main source of drinking water?</li> <li>xvi. What is/are your source(s) of fire?</li> <li>xvii. Is your child exposed to any form of noise in your area?<br/>(Mention)</li> <li>xviii. What type of toilet facility is used by your household?</li> </ul>                                                                                                        |
| <p><b>Knowledge and Recognition of signs and symptoms of an unwell child</b></p> | <ul style="list-style-type: none"> <li>1. When your child is sick, how to do you know? (Probe signs and symptoms of illnesses)</li> <li>2. How do you tell if the sickness is severe? (Probe)</li> <li>3. What do you do immediately you detect the above signs and symptoms you just mentioned? (Probe for facilitators for early treatment)</li> <li>4. Who do you talk to? (Probe who enforces the decision)</li> </ul>                                                 |

|                                       |                                                                                                                                                                                                                                                                                                                                                                                                                                                                                                                                                                                                                                                                                                                                                                                                                                                                              |
|---------------------------------------|------------------------------------------------------------------------------------------------------------------------------------------------------------------------------------------------------------------------------------------------------------------------------------------------------------------------------------------------------------------------------------------------------------------------------------------------------------------------------------------------------------------------------------------------------------------------------------------------------------------------------------------------------------------------------------------------------------------------------------------------------------------------------------------------------------------------------------------------------------------------------|
|                                       | <p>5. Have you been told what is wrong with your child?</p>                                                                                                                                                                                                                                                                                                                                                                                                                                                                                                                                                                                                                                                                                                                                                                                                                  |
| <p><b>Health Facility Factors</b></p> | <p>6. How often has your child been admitted at the hospital?</p> <p>7. How did you arrive at KATH with your ward? (Probe for proximity, referral processes, NHIS status, facilities or persons visited before KATH)</p> <p>8. For this visit, how long have you been here? (Probe for referrals)</p> <p>9. Kindly tell me how you were treated when you got here.</p> <p>10. What has been your experience (Probe for systematic narration of events from the first day)</p> <p>11. What challenges did you encounter? (Probe for delays, waiting time, comfort, healthcare provider attitude)</p> <p>12. What do you feel about the quality of care being given to your child?</p> <p>13. Are there any complaints from other caregivers you would like to share with me?</p> <p>14. Would you recommend that the leadership and health care providers do differently?</p> |
| <p><b>Socio-cultural factors</b></p>  | <p>15. Are there any beliefs in your community regarding sicknesses among children? (Probe for names and types of traditional illnesses)</p> <p>16. What is your perception about seeking healthcare from traditional healers in your community? (Probe sicknesses which could be treated by traditional healers)</p>                                                                                                                                                                                                                                                                                                                                                                                                                                                                                                                                                        |

|                            |                                                                                                                                                                                                                                                                                                                                                                                         |
|----------------------------|-----------------------------------------------------------------------------------------------------------------------------------------------------------------------------------------------------------------------------------------------------------------------------------------------------------------------------------------------------------------------------------------|
|                            | <p>17. Who in your family/household/ community influences where you seek treatment for your child or other children?</p> <p>18. What are your thoughts on seeking help from your religious leader (Pastor, Imam, Etc) before going to seek treatment from a health facility?</p>                                                                                                        |
| <p><b>Facilitators</b></p> | <p>19. Could you kindly share some of the things or experiences you have been happy about?</p> <p>20. What can be done to improve the earlier challenges you have discussed with me today?</p> <p>21. In your opinion, what would make the conditions of caregivers and their children better in this facility?</p> <p>22. Are there any other issues you would want us to discuss?</p> |

Thank you for your participation.

**INTERVIEW GUIDE FOR HEALTHCARE PROVIDERS**

**Code: IDI/REACH/CG.....**

Date: ...../...../.....

Length of the interview:

Place of the interview:

Interviewer:

Note taker:

## **Introduction**

Good morning! My name is ....., I am here to have a little discussion with you about your time at KATH as a physician. This conversation is very confidential and will not be linked to you in any way as I will not ask for your names but use a code to identify you. I would like to record the discussion using a tape recorder so that I do not miss out on any important information. This recorded information is for research purposes only and will not be given out to anyone who is not a member of the research team. After we have written out the conversation, it will be erased completely from the memory of the tape recorder. This discussion will last for about 20 minutes. The information gathered will help us to better implement strategies to reduce child morbidity and mortality in Ghana and Africa.

If you agree, I would put on the tape recorder and then you say I agree so that we start.

### **Background Characteristics:**

Gender

Occupation (Nurse, resident, house officer)

Years of experience (< 1 year, 1 – 5 years, 5 – 10 years, > 10 years)

Shift of work (day vs night)

### **Questions:**

What brought you into medicine?

What do you like most about your job?

What is the hardest part of your job?

What are some barriers/challenges that you encounter at work?

What are signs that a child has severe sepsis?

What are your goals in treating a child with sepsis?

Specifically, what prevents you from achieving these goals?

What are things that help you to achieve these goals?

Do you think having additional training on the management of severe sepsis would be helpful?

What are some reasons that you think families present to the emergency department late in illness?

If you could change things about your work environment, what would it be?

Could you kindly share some of the things or experiences you have been happy about?

What can be done to improve the earlier challenges you have discussed with me today?
